# Supplementary material for: On-Crystal Optical Modulator from Polarized Propagation of Lanthanide-Titanium Nanoclusters
Source: Research Square preprint supplement (doi:10.21203/rs.3.rs-6382829/v1), 2025-04-11
Supplement: Supplementary file 1 [file 232aeace2e85ff1890007a6b.docx]

**Supplementary Information**

**On-Crystal Optical Modulator from Polarized Propagation of Lanthanide-Titanium Nanoclusters**

Feng Jiang1,2,5, Lei Qin3,5, Qi Sun4,5, Shengrong He1, Weinan Dong1, Haifeng Zhu1, Lingchen Meng4, Peng Xu4, Wenming Tian4, Yuan Ji2, Zhennan Wu1,*, Yu Zhang1,* and Xue Bai1,*

1State Key Laboratory of Integrated Optoelectronics, JLU Region, College of Electronic Science and Engineering, Jilin University, Changchun 130012, P. R. China.

2College of Physics, Jilin University, 2699 Qianjin Street, Changchun 130012, P. R. China.

3Department of Chemistry, Southern University of Science and Technology, Shenzhen, Guangdong 518055, P. R. China.

4State Key Laboratory of Molecular Reaction Dynamics, Dalian Institute of Chemical Physics, Chinese Academy of Sciences, 457 Zhong Shan Road, Dalian 116023, P. R. China.

5These authors contributed equally: Feng Jiang, Lei Qin, and Qi Sun.

*Corresponding author: wuzn@jlu.edu.cn; yuzhang@jlu.edu.cn; baix@jlu.edu.cn

**Supplementary figures**


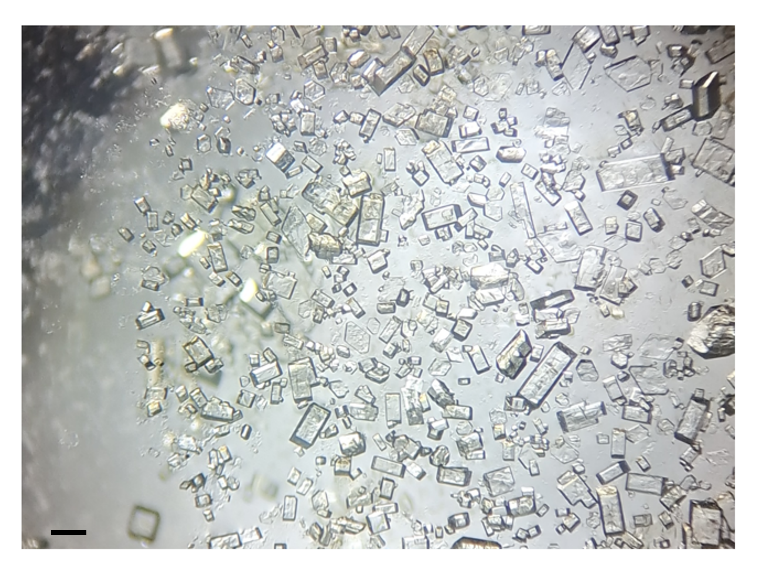


**Supplementary Fig. 1:** Photographs of Eu8Ti10 NCs single crystals. Typical optical image of as-grown large-scale Eu8Ti10 NCs single crystal, whose size can be well controlled by the growth time, with the maximum lateral size reaching a millimeter scale. Scale bar: 100 μm.


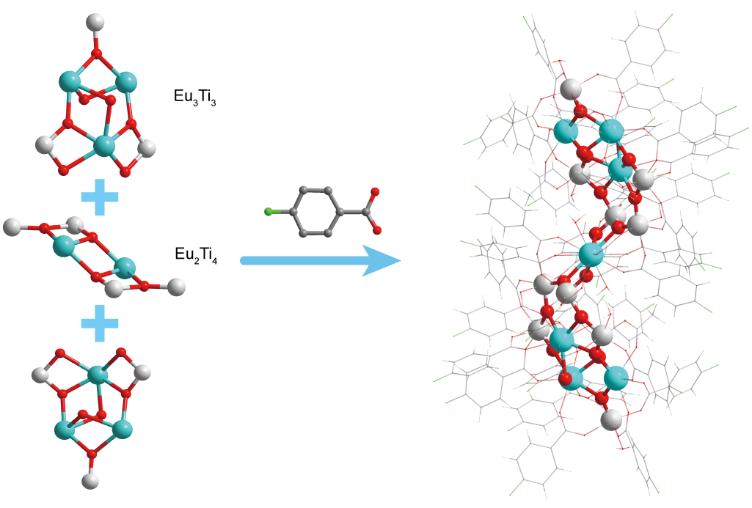


**Supplementary Fig. 2:** Ball-and-stick view of the assembly of the metal skeleton of Eu8Ti10 NCs, consisting of two [Eu3Ti3] units connected by one planar [Eu2Ti4] unit and four O2- atoms, which is further stabilized by ligands, two THF, and four water molecules.


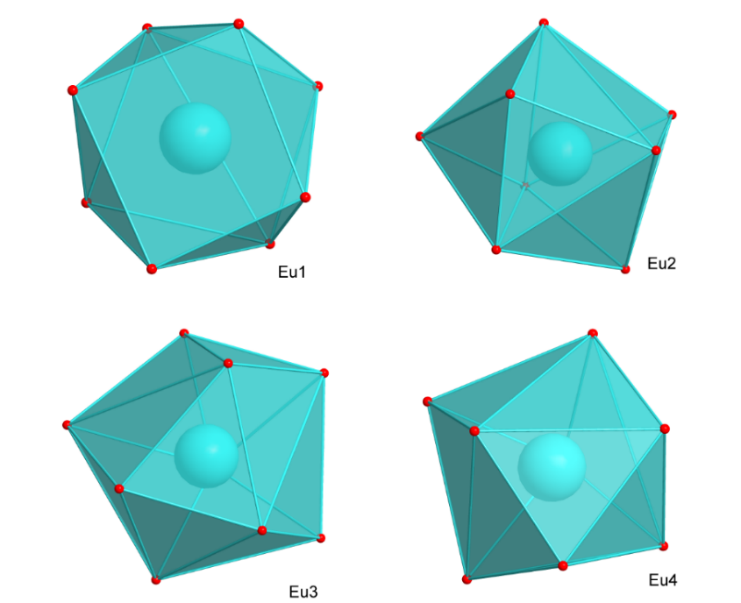


**Supplementary Fig. 3:** The coordination geometry of Eu3+. Eu1 exhibits an eight-coordinate biaugmented trigonal prism geometry. Eu2 and Eu4 are eight-coordinated, showing a square antiprism geometry, while Eu3 is nine-coordinated adopting a muffin geometry.


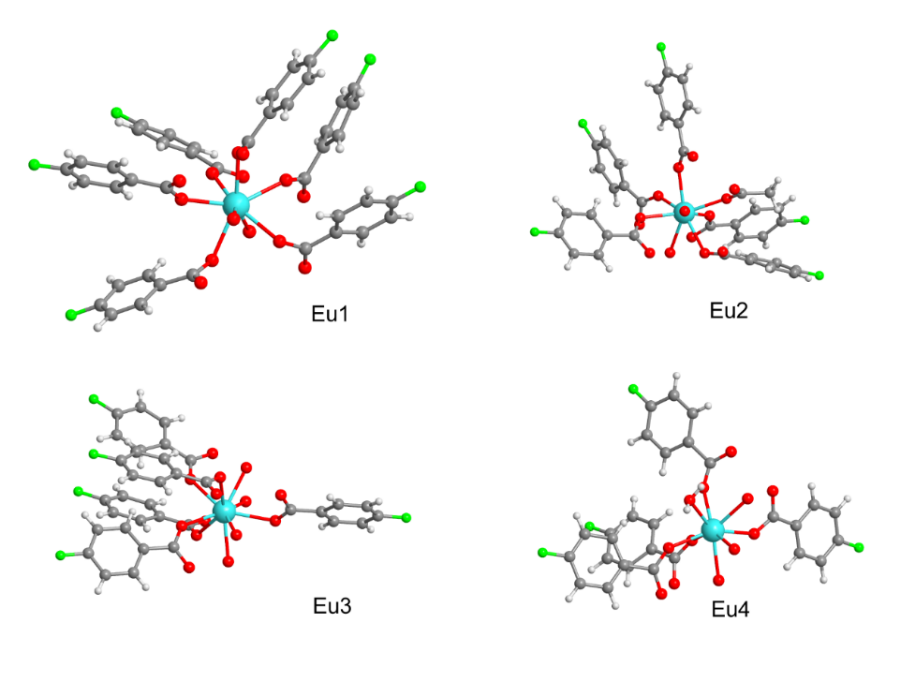


**Supplementary Fig. 4:** The coordination environment of Eu3+ ion.


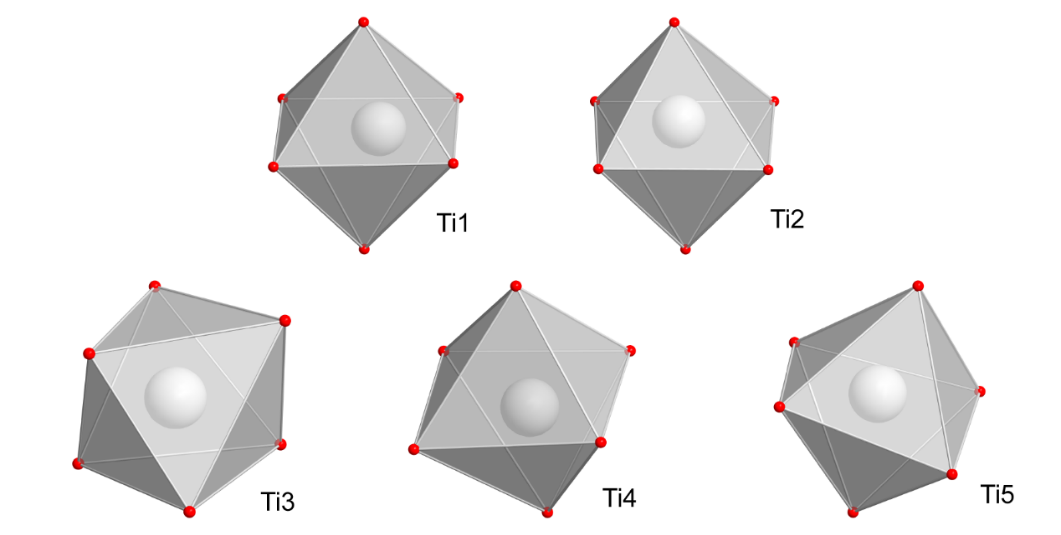


**Supplementary Fig. 5:** The coordination geometry of Ti4+ ion. All the Ti⁴⁺ ions are six-coordinated with distorted octahedral configurations.


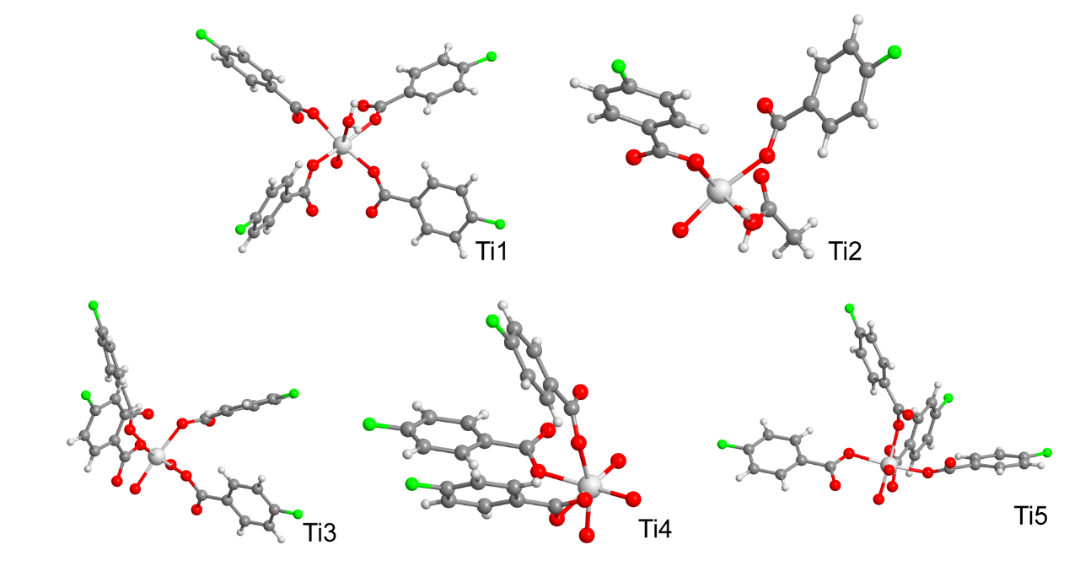


**Supplementary Fig. 6:** The coordination environment of Ti4+ ion.


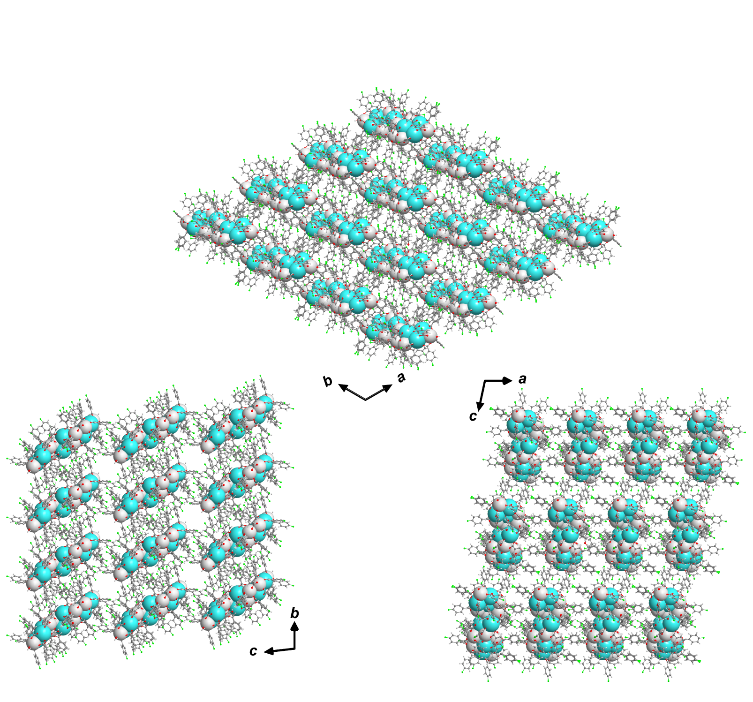


**Supplementary Fig. 7:** The packing structure of Eu8Ti10 NCs in *a, b,* and *c*-axis.

**
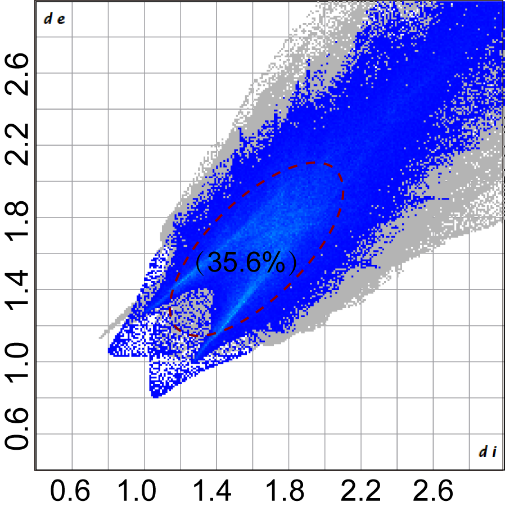
**

**Supplementary Fig. 8:** The 2D fingerprint plots and percentages of non-covalent interaction within Eu8Ti10 crystal.


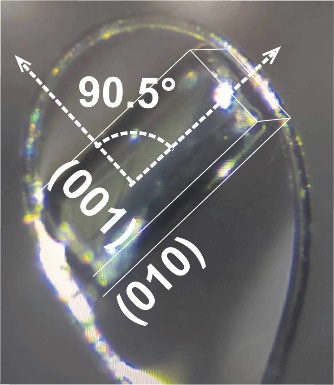


**Supplementary Fig. 9:** A crystal with side facets indexed as (010) and (001) by SC-XRD.


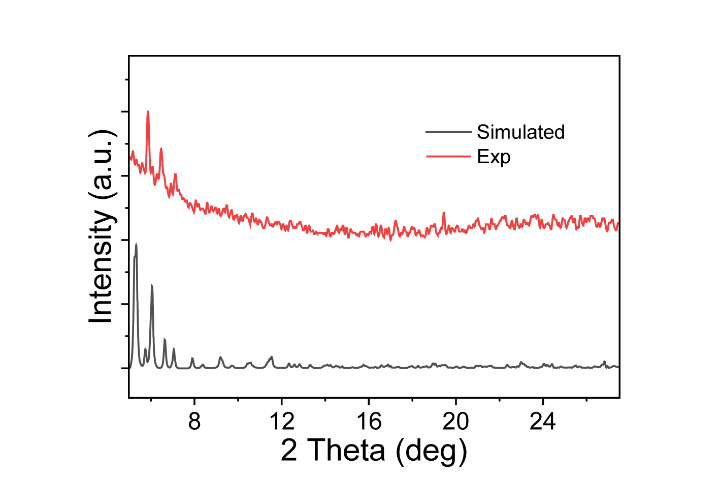


**Supplementary Fig. 10:** The XRD of Eu8Ti10. The peak positions of the clusters are consistent with the simulated peak position from the crystal data.


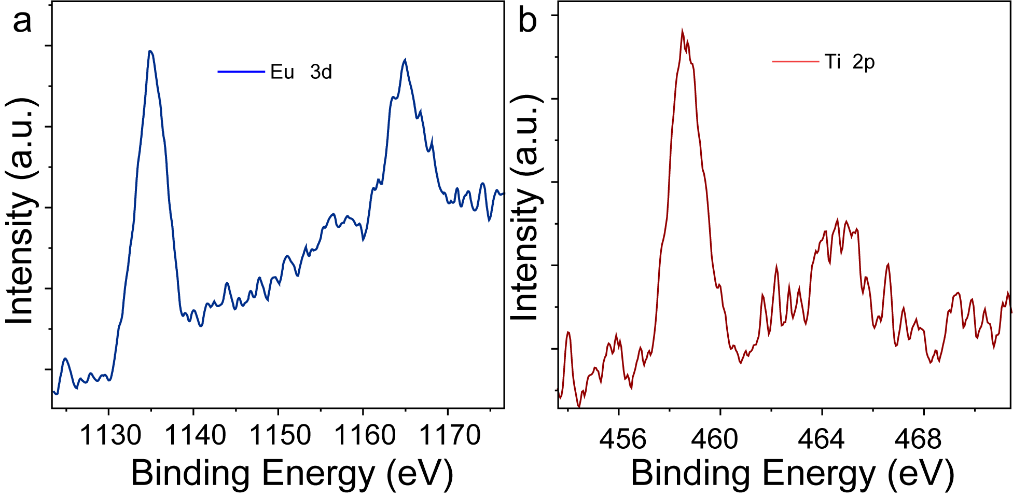


**Supplementary Fig. 11:** The XPS of Eu8Ti10. The binding energy peaks at 1130-1170 eV and 456-468 eV, corresponding to Eu 3d (a) and Ti 2p (b), respectively.


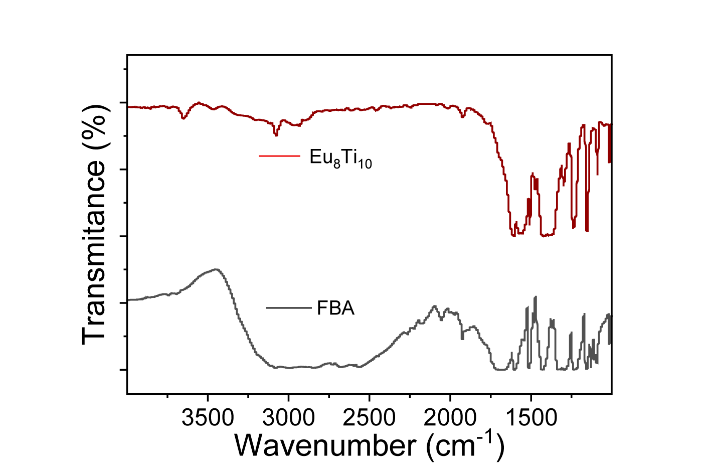


**Supplementary Fig. 12**: IR spectra in 1000-4000 cm-1. The strong absorption bands in the range of 1605-1552 cm-1 are due to the asymmetric and symmetric stretching vibrations of the carboxyl group.


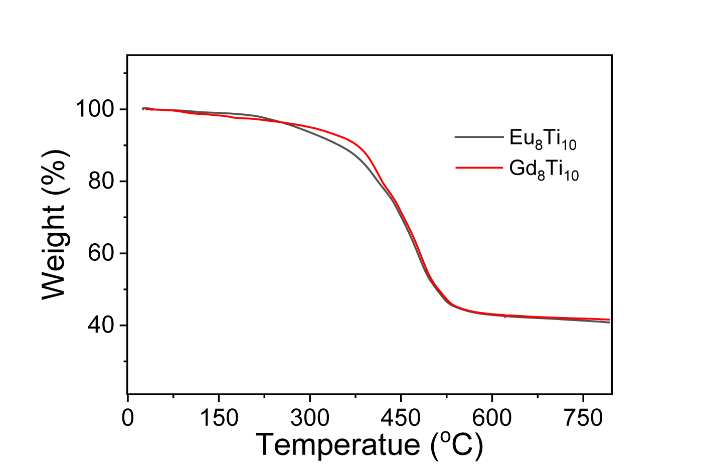


**Supplementary Fig. 13:** Thermogravimetric analysis (TGA) curves of Eu8Ti10 under atmosphere. The clusters displayed a weight loss of 9.62 % between room temperature to 257 oC, which corresponds to the loss of the guest molecules. When the temperature is higher than 257 oC, the NCs begin to decompose.


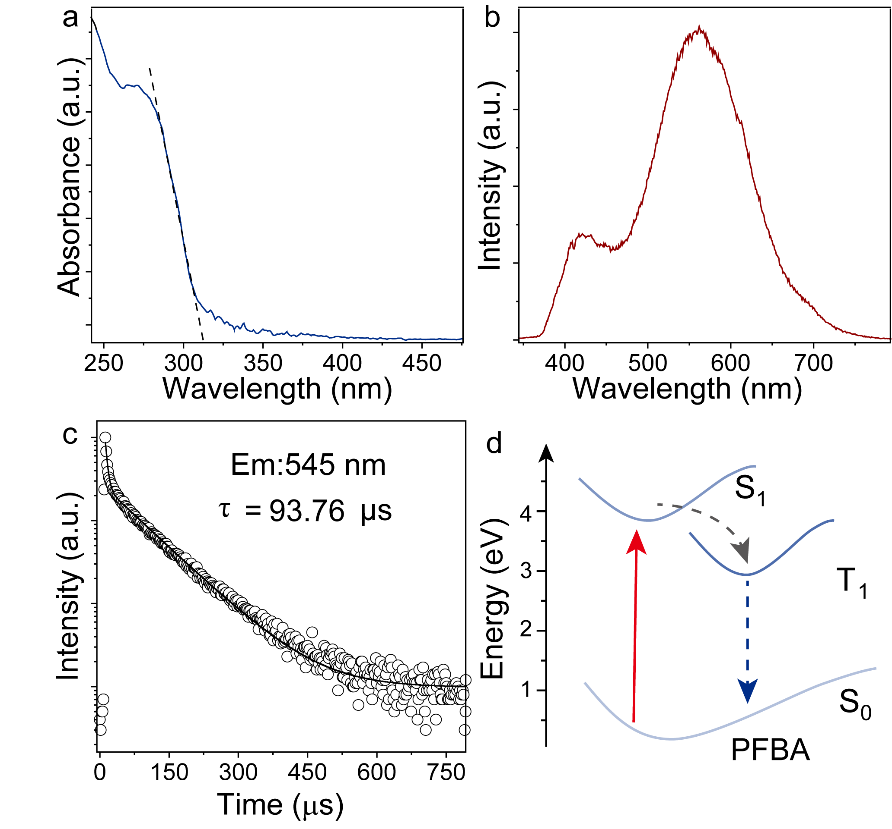


**Supplementary Fig. 14:** a) UV-vis absorption spectrum of ligand; b) Phosphorescence spectra of Gd8Ti10; c) The decay curves of Gd8Ti10;d) Energy level diagram of ligand. The high absorption coefficient of the FBA molecule benefits the efficient absorption of excitation light energy, giving rise to the transition to its singlet state. The occurrence of efficient intersystem crossing process is in line with *Reinhoudt*’s empirical rules due to the appropriated gap (>5000 cm−1) between the singlet and triplet excited states of FBA. The singlet (328 nm, 30488 cm-1) and triplet (410 nm, 24390 cm-1) energy levels of FBA were estimated by referring to the wavelength of UV/Vis absorbance edge of FBA and the shortest wavelength phosphorescence band of the ligand at 77K.


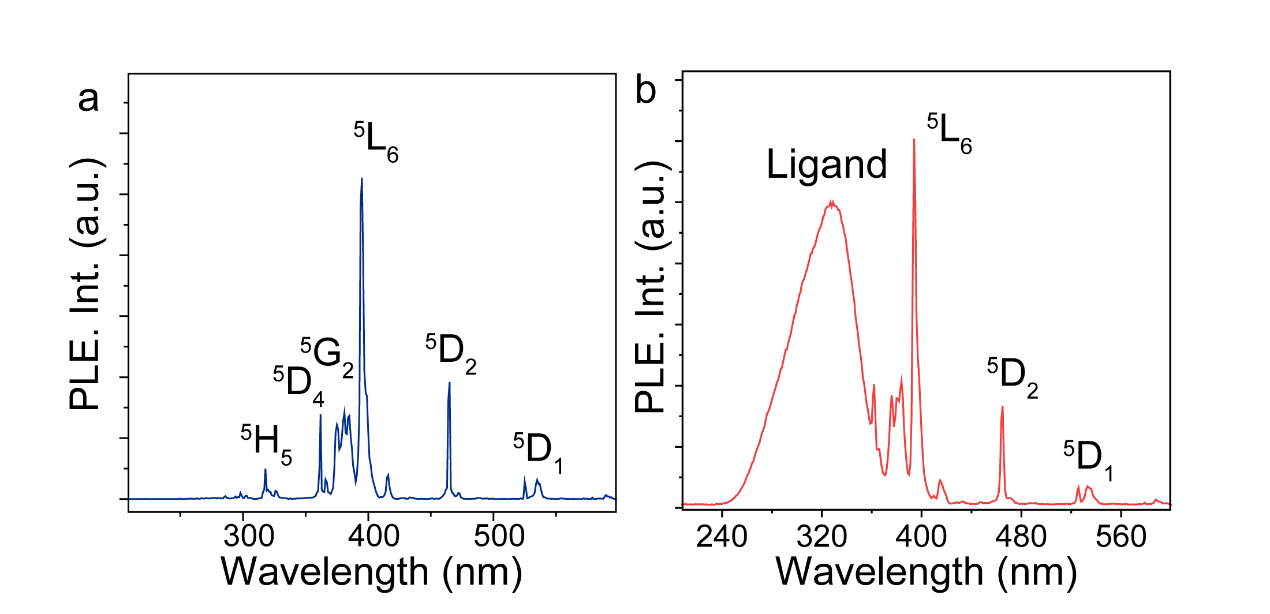


**Supplementary Fig. 15:** a) The excitation spectra of the Eu3+ from the Eu(Ac)3·3H2O; b) The excitation spectra of the Eu8Ti10 crystal. The donor FBA exhibits an emission spectrum that overlaps with the excitation spectrum of acceptors (Eu3+ ions), satisfying a basic requirement for energy transfer to occur, which indicates that these ligands can be used as good antenna molecules to sensitize Eu3+ ions and obtain excellent luminescence properties, a direct energy transfer from ligand to Eu3+ ions on the excitation spectrum.


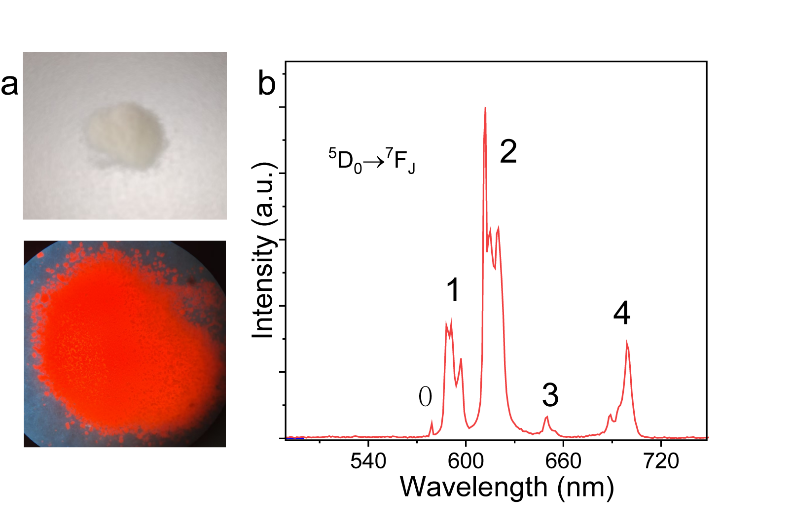


**Supplementary Fig. 16:** a) The photographs of the compound in daylight (up) and under 365 nm excitation (down); b) The emission (red) spectra of the Eu3+ from the power of the crystal.


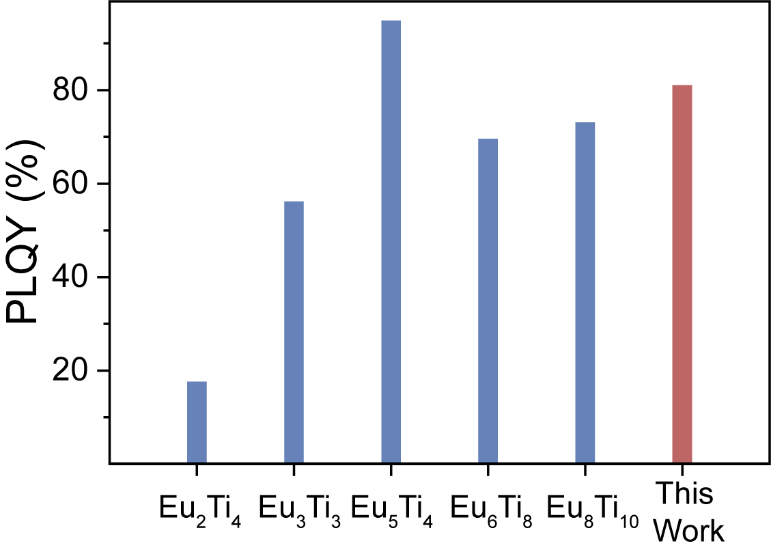


**Supplementary Fig. 17:** The comparison of the quantum yields among typical 3d-4f NCs.1,2 Several of the clusters used for reference here are protected by 4-*tert*-butylbenzoate acid, and their properties have been studied in depth in previous literature. In our study, we chose *p*-fluorobenzoic acid instead of 4-*tert*-butylbenzoate acid for the synthesis of Eu8Ti10 NCs. The clusters we synthesized maintain the same metal-core structure, however, the modification of the ligands has led to a significant improvement in the PLQY.


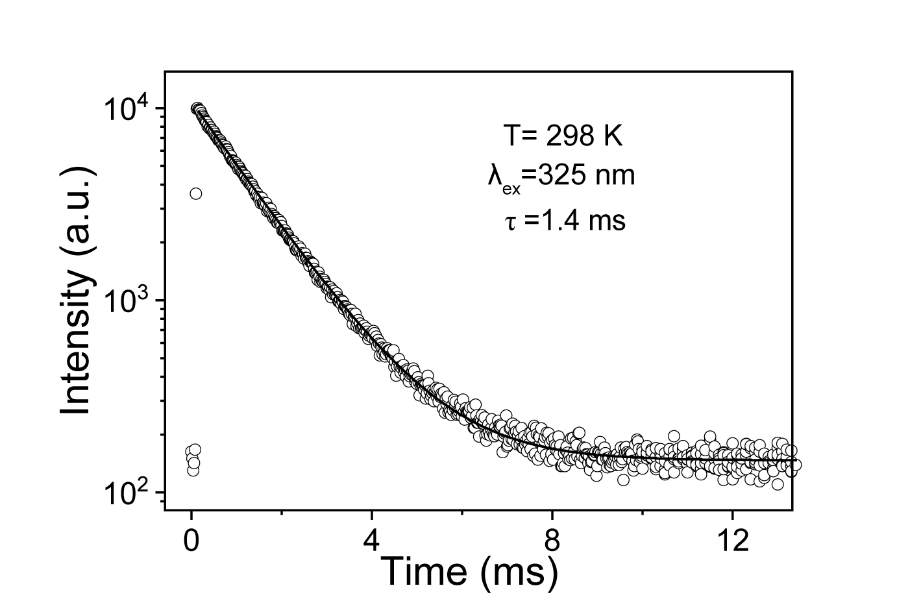


**Supplementary Fig. 18:** The decay time of Eu8Ti10 crystal at room temperature. The long lifetime values of the crystals indicate the ligands suppress the nonradiative-decay pathway among the various transition levels and eﬀectively transfer energy to the metal ions.


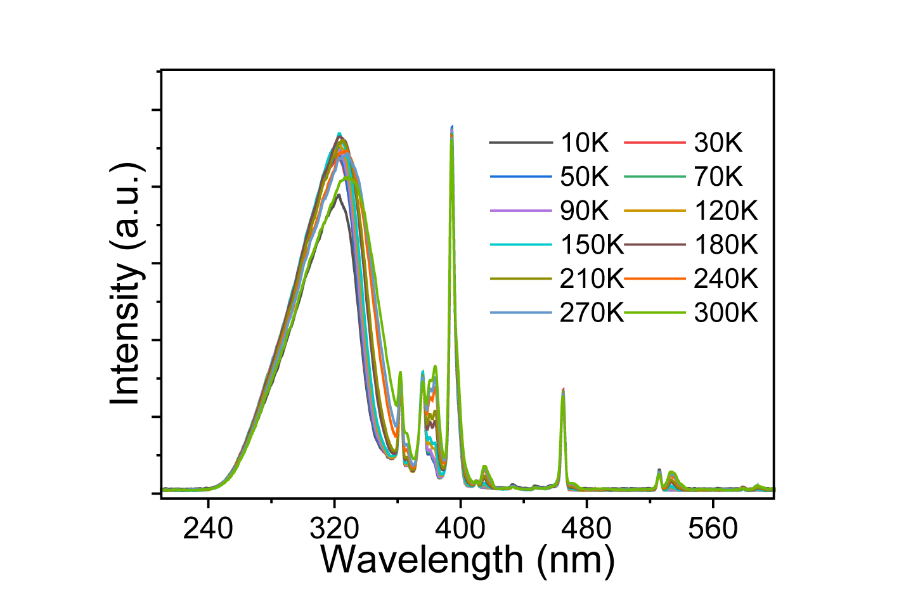


**Supplementary Fig. 19:** The temperature-dependent PL excitation *λem* = 612 nm) o crystals in the temperature range of 10-300 K. As the temperature decreases from 300 K to 10 K, the excitation band strength of the crystal remains essentially unchanged, due to the weak electron-phonon coupling in the crystal. Moreover, the excitation spectrum of the crystal remains stable during the temperature change, which indicates an efficient energy transfer from the molecular ligand to Eu3+.


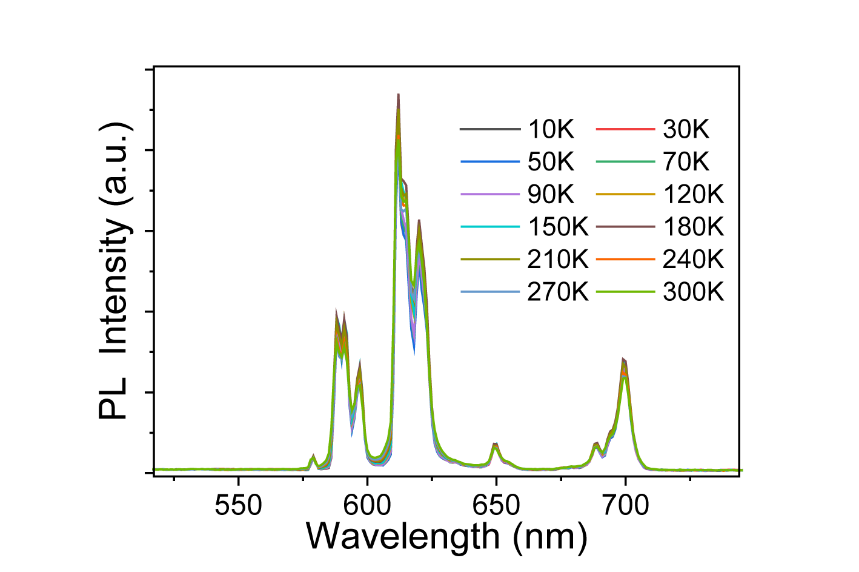


**Supplementary Fig. 20:** The temperature-dependent PL (λ*ex* = 325 nm) of the crystals in the temperature range of 10-300 K.


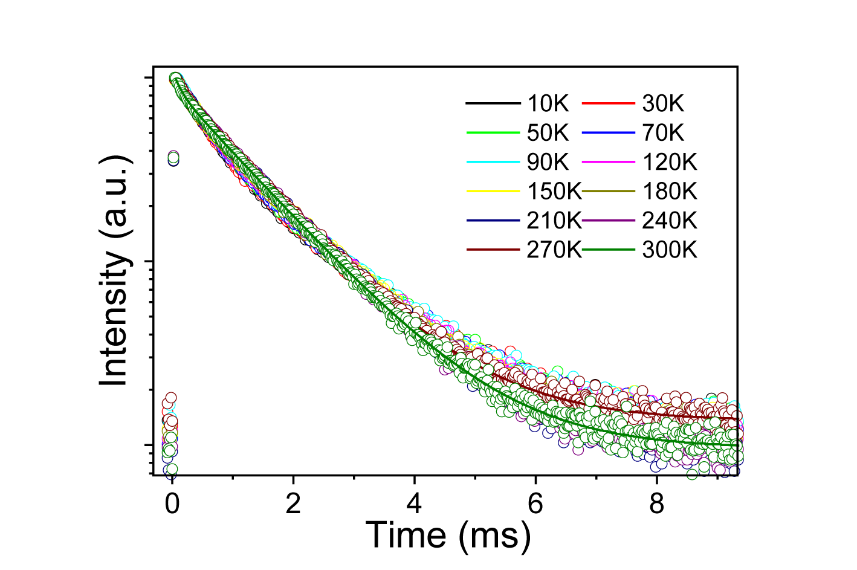


**Supplementary Fig. 21:** The temperature-dependent decay (λ*em* = 615 nm) of the crystals in the temperature range of 10-300 K. The PL decay of the crystals displayed a single exponential decay with a fitted PL lifetime of 1.4 ms, suggesting a homogeneous crystal-field environment around Eu3+.


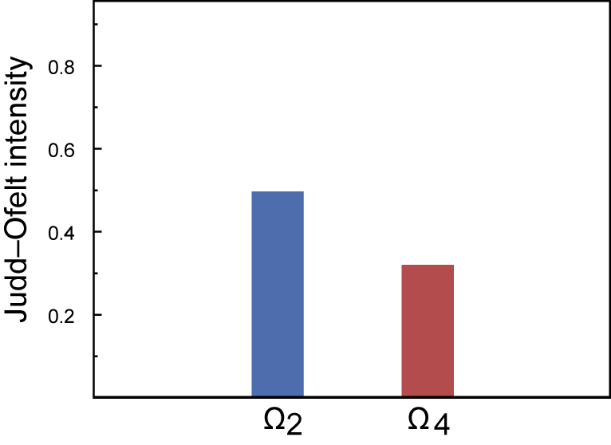


**Supplementary Fig. 22:** Judd-Ofelt intensity parameters of Eu3+ in crystal. The Judd-Ofelt intensity parameters were calculated from the emission spectra, which are closely related to short-range covalent and long-range bulk properties of the local field. According to the previous investigations, the J-O intensity parameters (Ω2 = 0.497 cm-2) can be obtained based on the ratio between EDT and MDT rates of Eu3+.


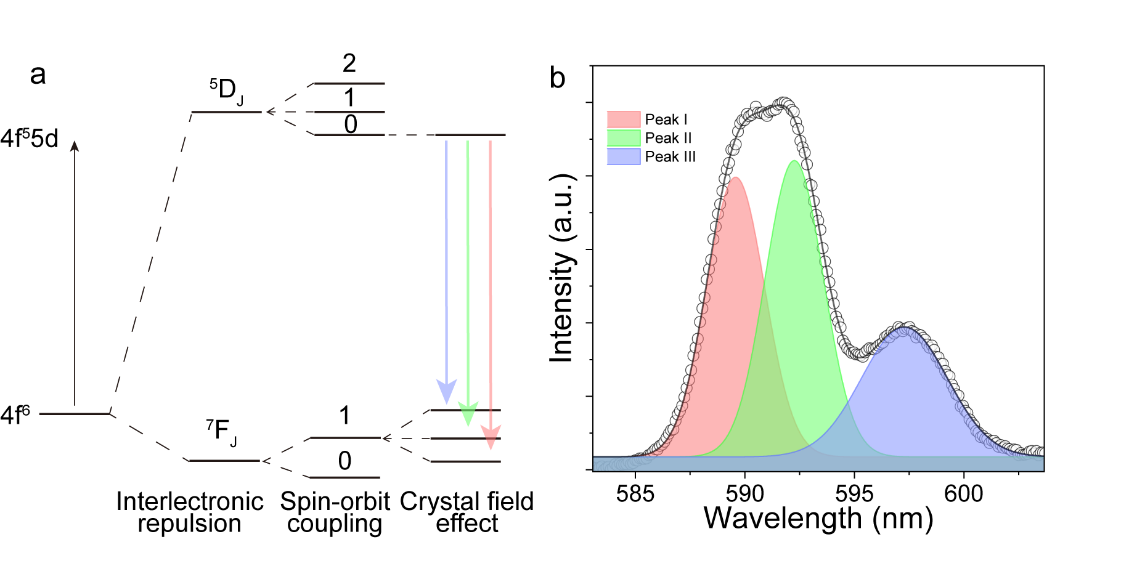


**Supplementary Fig. 23:** a) Schematic illustration of partial energy levels (4f6) of Eu3+ ions in the crystal. The degeneracy of the 7F1 level is lifted to three sublevels by the crystal-field perturbations; b) Spectral fitting analysis in the 5D0→7F1 transition range by using the photoluminescence spectrum as an example. The spectrum is well fitted by the sum of three Lorentzian peaks in which the baseline is taken as a flat line with averaged intensity between 583 nm and 605 nm. The peaks with their respective area integrals are highlighted in different colors.

**
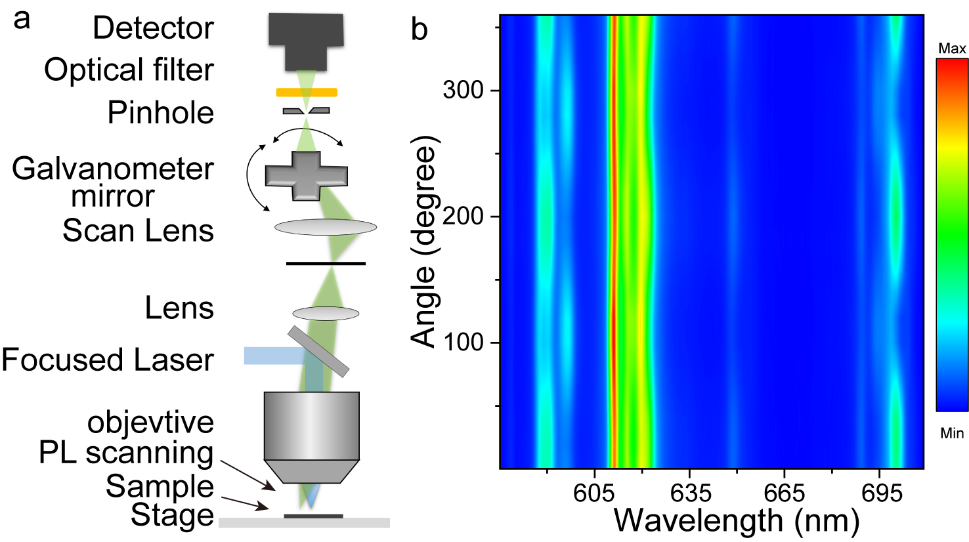
**

**Supplementary Fig. 24:** a) A scheme of the optical microscopy setup used to conduct the polarization analysis; b) PL image of the single crystal excited and recorded at different polarization and the emission intensities of the broad wavelength range.

**
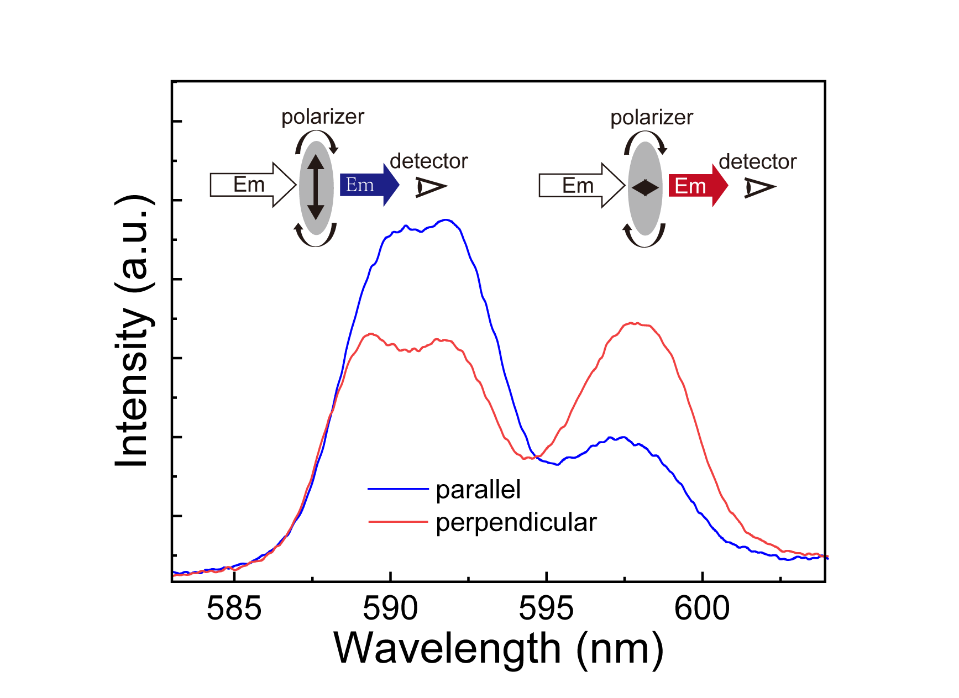
**

**Supplementary Fig. 25:** Polarized fluorescence emission spectra from a crystal under laser (λ = 375 nm) irradiation obtained with a polarizer in parallel and perpendicular positions to the orientation of the crystal.


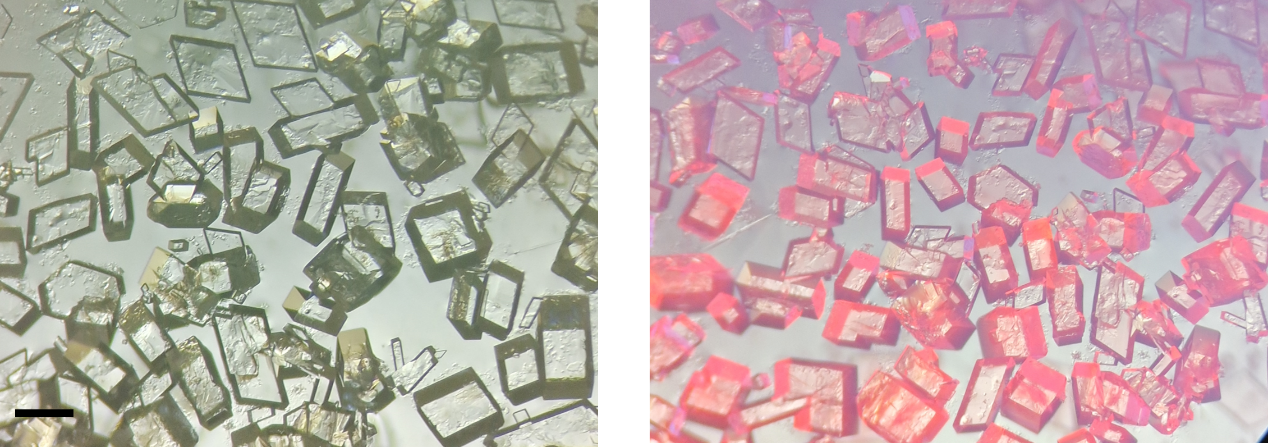


**Supplementary Fig. 26:** The photoluminescence microscope images of crystals under visible light (left) and fluorescence microscopy images under unfocused irradiation (right). Scale bar: 100 μm.


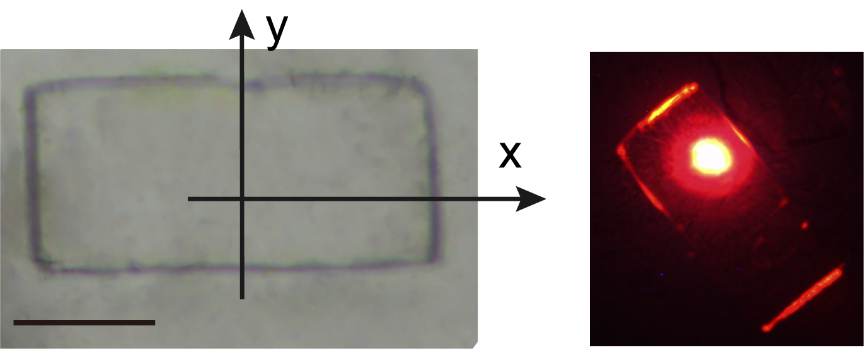


**Supplementary Fig. 27:** Bright-field (left) and PL images (right) obtained from a single crystal by exciting the center with a UV laser (λ = 375 nm). Solid arrows show the predominant guiding directions. Scale bar: 50 μm.


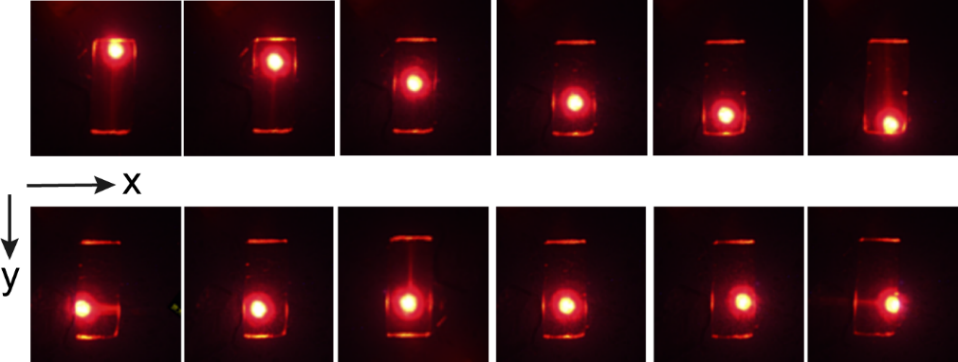


**Supplementary Fig. 28:** PL images obtained from a single crystal by exciting the microplate at different positions along different directions.


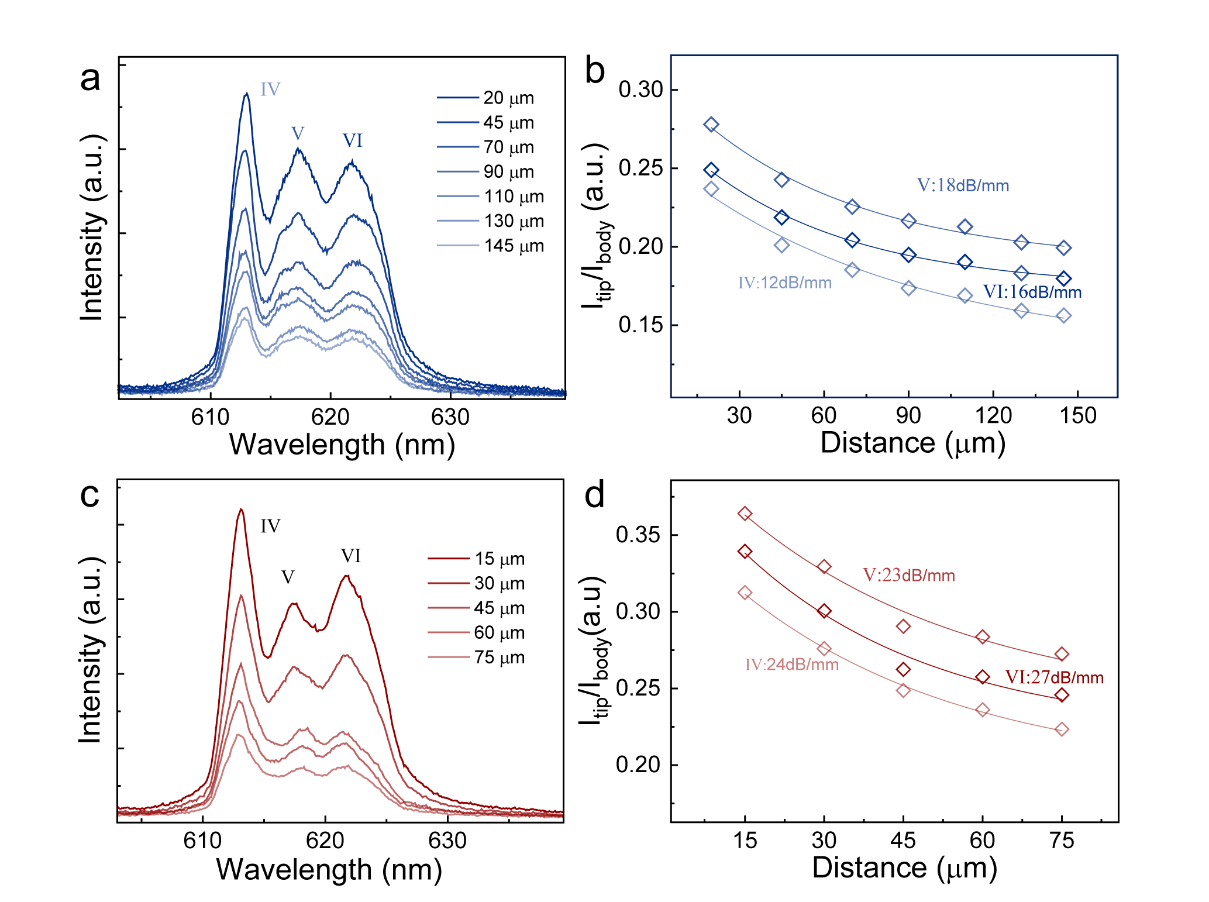


**Supplementary Fig. 29:** Spatially resolved PL spectra from the tip of the microplate for different distances between the excitation spot and tip of the plate; b) Fitted exponential function curves based on intensity ratio *Itip/Ibody* against distance to obtain the optical loss coefficient from the (a); c) Spatially resolved PL spectra from the tip of the microplate for different distances between the excitation spot and tip of the plate; d) Fitted exponential function curves based on intensity ratio *Itip/Ibody* against distance to obtain the optical loss coefficient from the (c).

**Supplementary table**

**Supplementary Table 1.** Crystallographic data for compounds **Eu8Ti10**.

| Compound | **Eu8Ti10** |
| --- | --- |
| Formula | C298H246Eu8F34N20O96Ti10 |
| FW | 7983.81 |
| T/K | 100 |
| Cry. system | triclinic |
| Space group | *P*-1 |
| *a* /Å | 19.4140(8) |
| *b* /Å | 19.4367(6) |
| *c* /Å | 25.5860(9) |
| *α* /o | 90.5060(10) |
| *β* /o | 100.256(2) |
| *γ* /o | 119.3980(10) |
| V/Å3 | 8224.8(5) |
| Z | 1 |
| Dc/g cm–3 | 1.612 |
| *μ*/ mm–1 | 1.832 |
| Data/parameters | 28954/2059 |
| 2*θ*/o | 4.476-50.018 |
| Obs. reflections | 104679 |
| F(000) | 3972.0 |
| GOF | 1.102 |
| R1[I> 2σ(I)]a | 0.00489 |
| wR2(All data)b | 0.1228 |

**Reference**

1 Lu, D.-F. *et al.* High-Nuclearity Lanthanide-Titanium Oxo Clusters as Luminescent Molecular Thermometers with High Quantum Yields. *Inorg. Chem.* **56**, 12186-12192 (2017).

2 Zhao, Y.-R. *et al.* The Effect on the Luminescent Properties in Lanthanide-Titanium OXO Clusters. *Inorg. Chem.* **58**, 10078-10083 (2019).
